# Supplementary material
Source: PubMed Central journal article supplement (PMC5992097)

Figure 1a

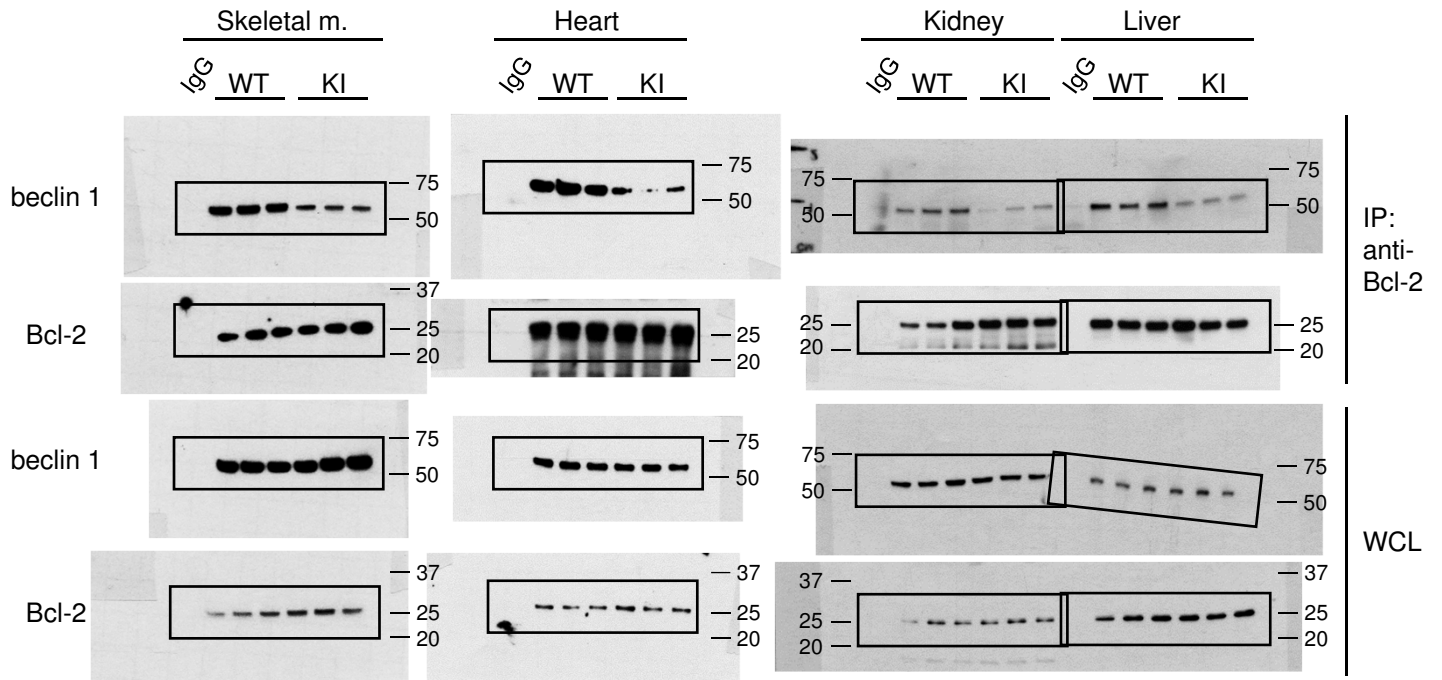

Figure 1e

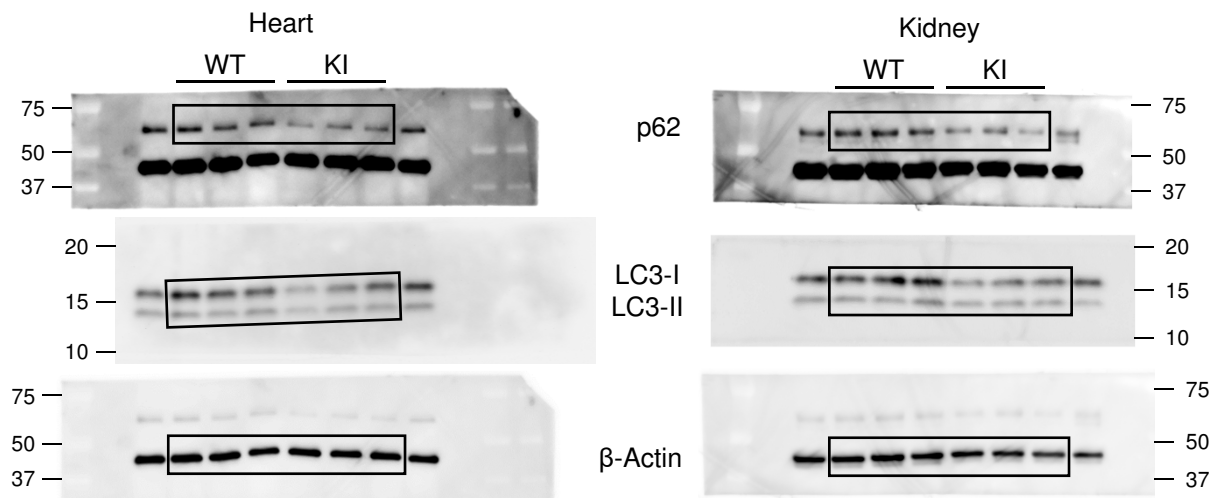

Note : Boxes represent the cropped images shown in the indicated figures and extended figures. Molecular weights are in kDa

Figure 4a

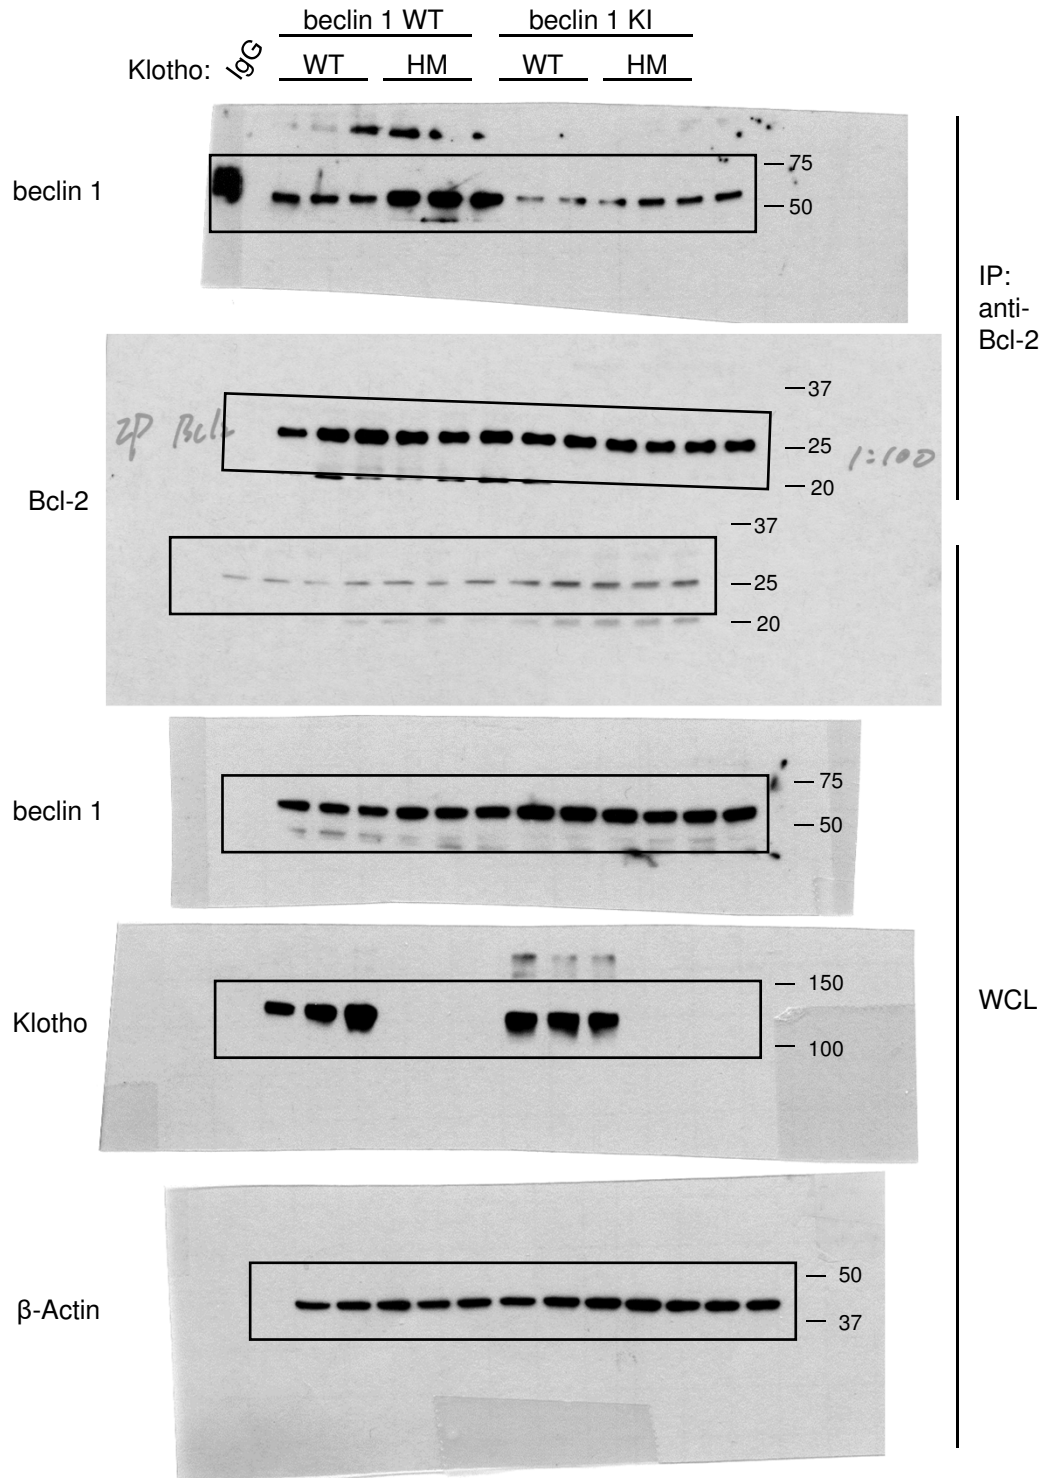

Figure 4c

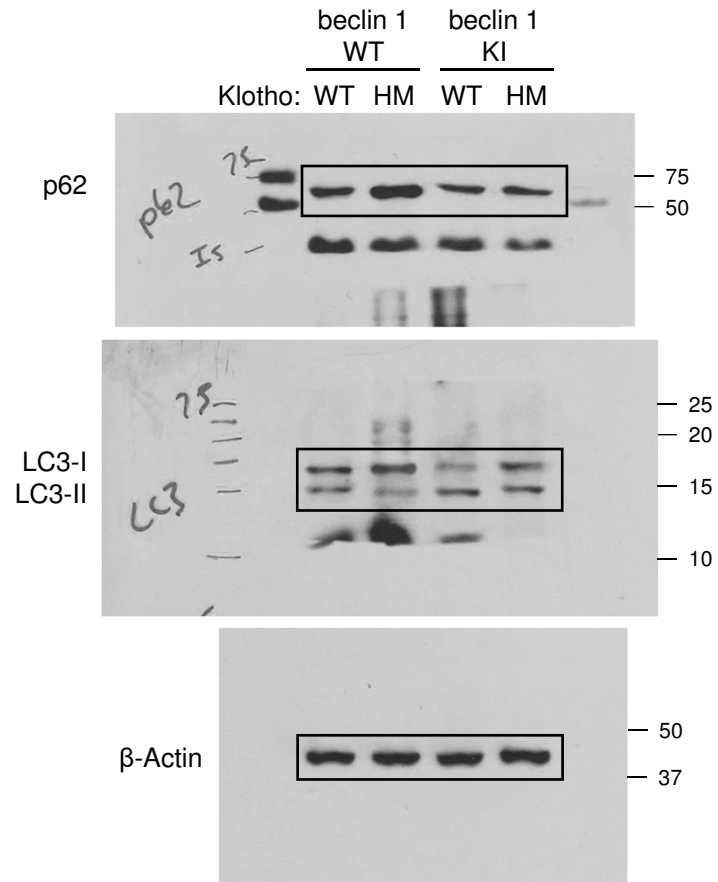

### Extended Data Figure 2a

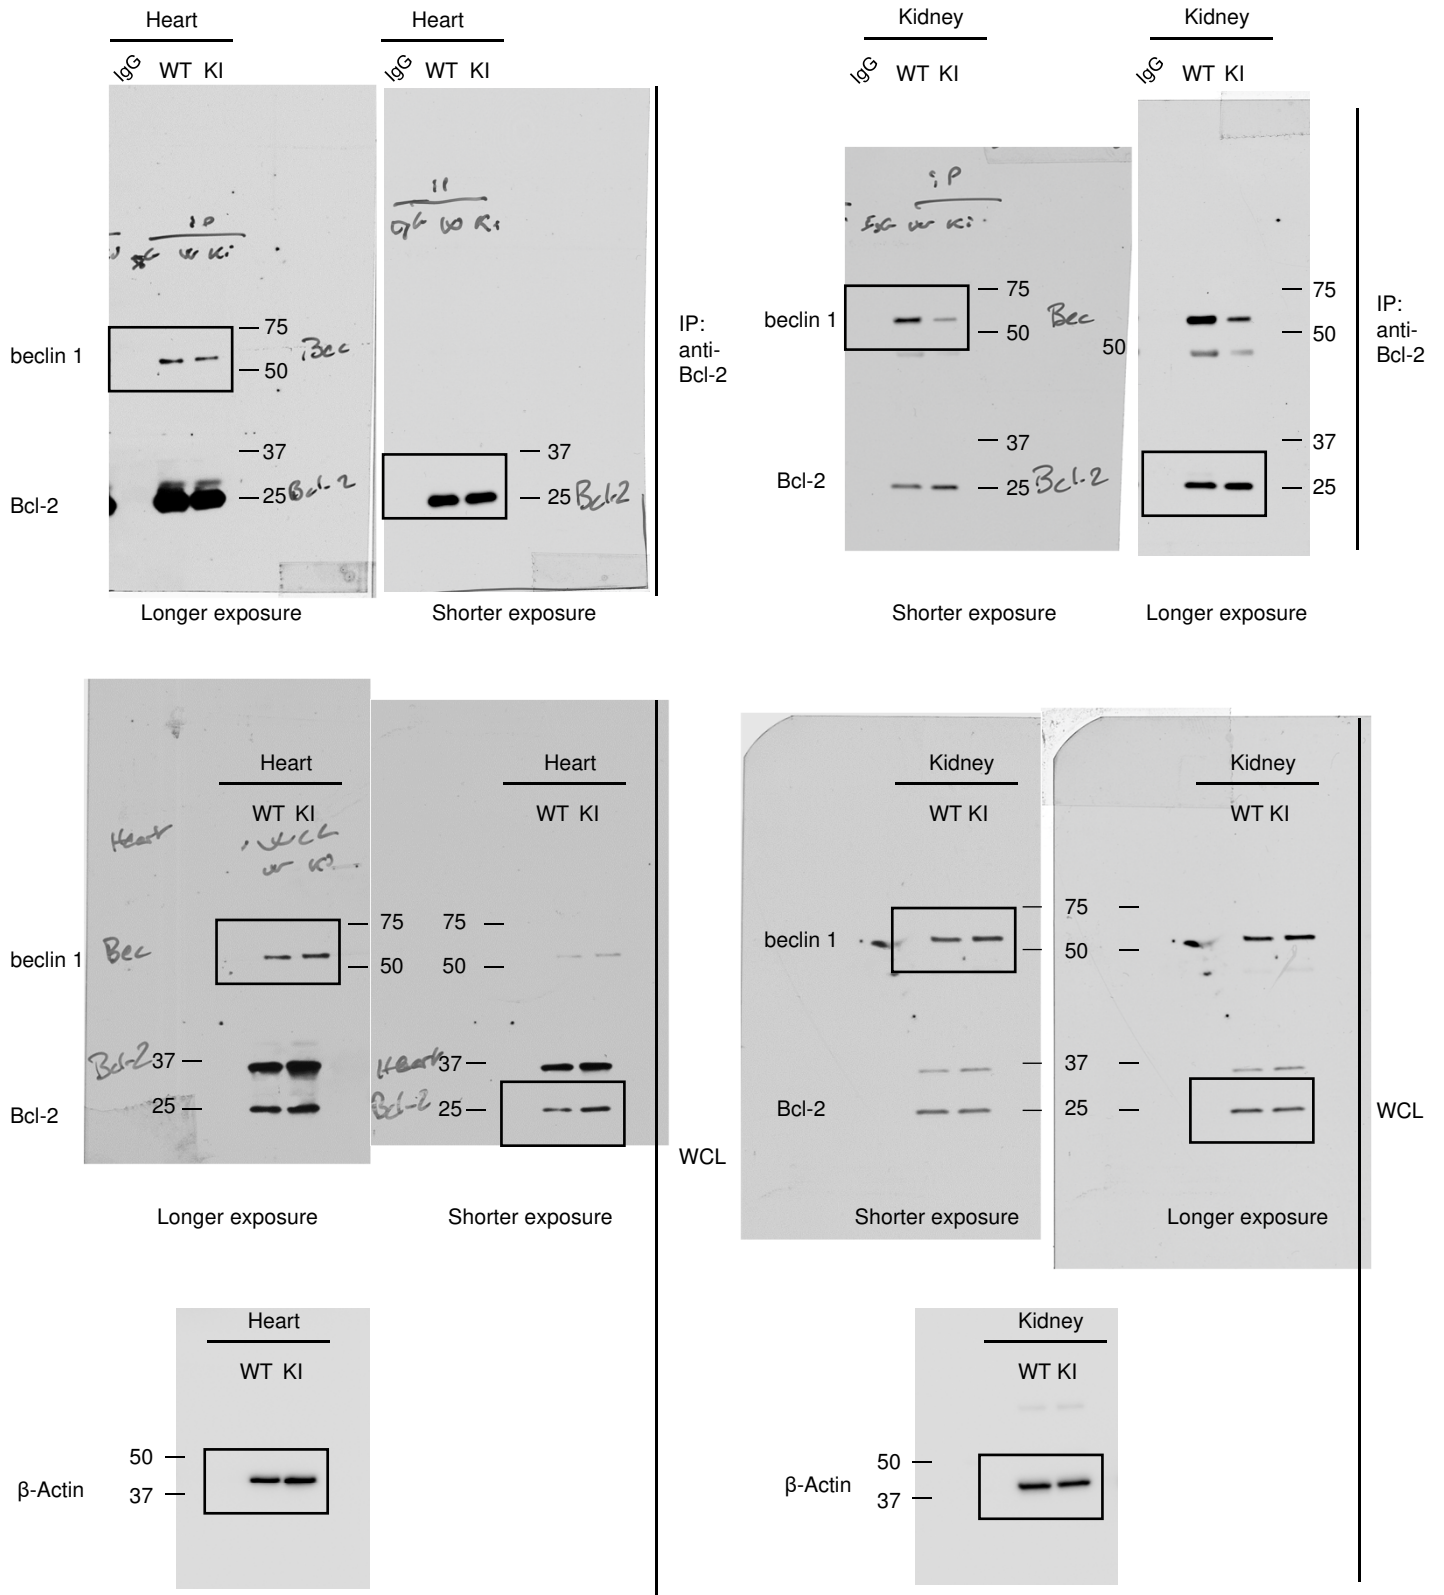

# Extended Data Figure 2d

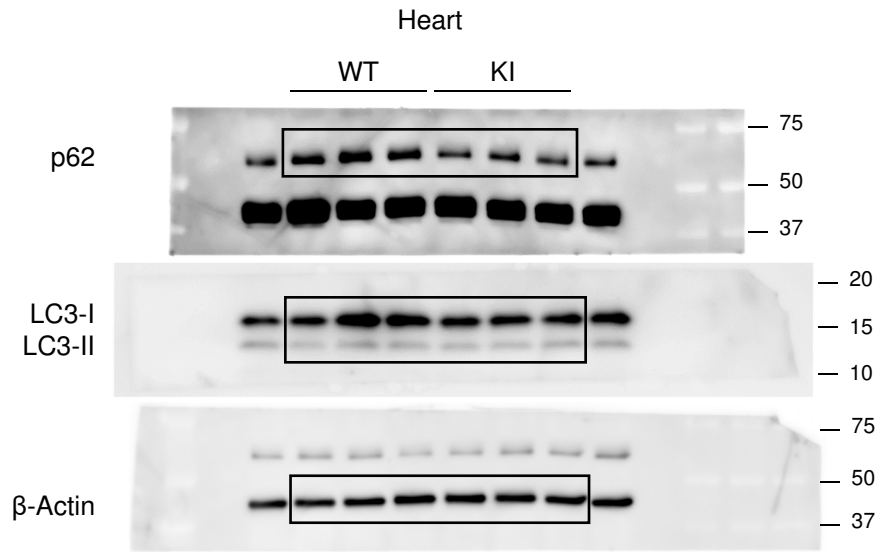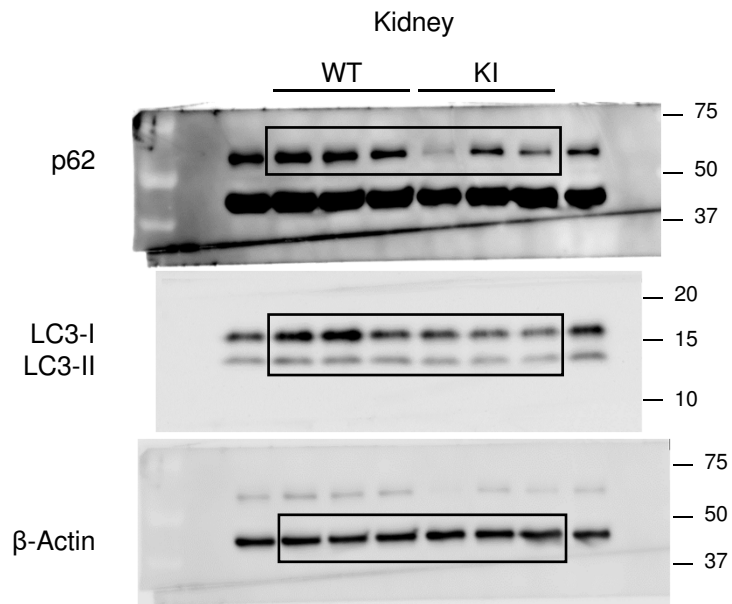

Extended Data Figure 3a

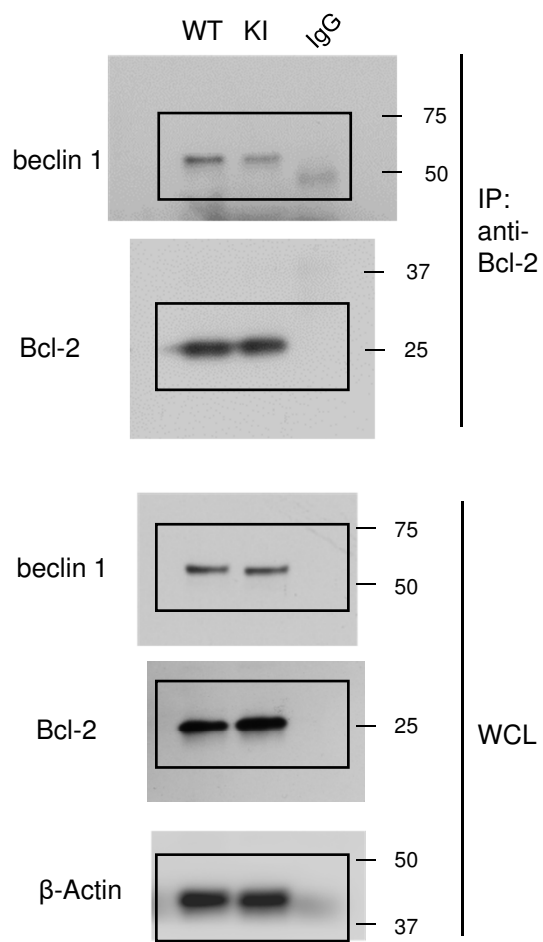

Extended Data Figure 3c

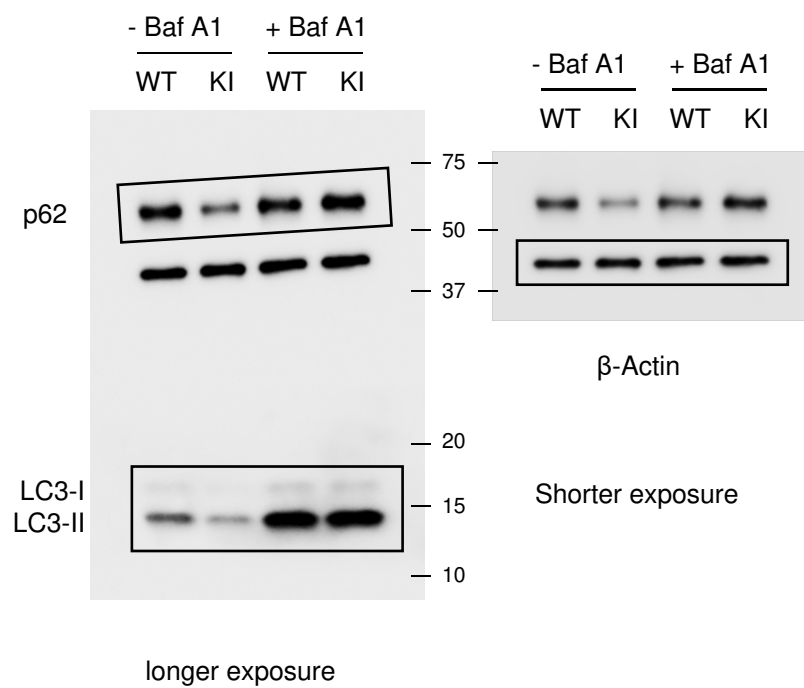

Extended Data Figure 5

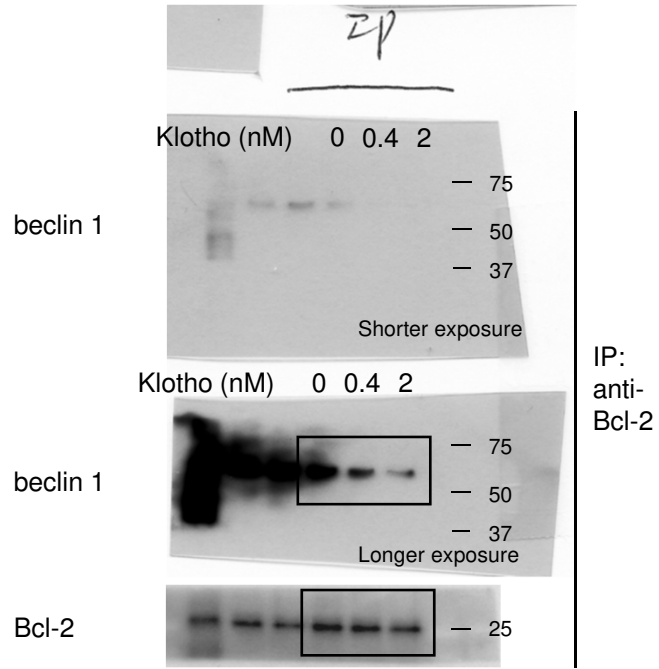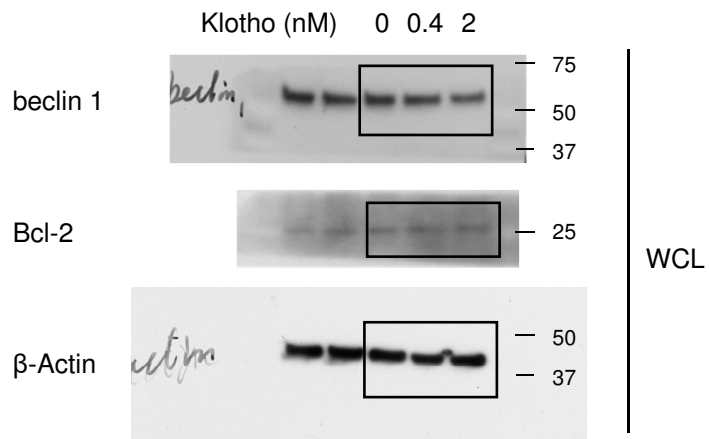

Supplement: NIHMS960525-supplement-1.pdf [file NIHMS960525-supplement-1.pdf]
